# Supplementary material for: Improvement of modelling plant responses to low soil moisture in JULESvn4.9 and evaluation against flux tower measurements
Source: Copernicus journal article supplement (doi:10.5194/gmd-2020-273), 2020-09-24
Supplement: Supplementary file 1 [file gmd-2020-273-supplement.pdf]

Supplemental Material for **Improvement of modelling plant responses to low soil moisture in JULESvn4.9 and evaluation against flux tower measurements**

Table SM1. Sites used in this study. Prescribed soil moisture levels are the 4 depths in default JULES soil (1=0-0.1m; 2=0.1-0.35m; 3=0.35-1.0m; 4=1-3m).

| Site    | Lat    | Lon     | Class  | Run dates  |            | Prescribed |             |
|---------|--------|---------|--------|------------|------------|------------|-------------|
|         |        |         |        | start      | end        | LAI        | SM          |
| LBA-BAN | -9.82  | -50.15  | DecSav | 2004-01-02 | 2006-10-31 | y          | y (1,2,3,4) |
| LBA-FNS | -10.76 | -62.36  | C4G    | 1999-01-02 | 2001-12-31 |            |             |
| LBA-K34 | -2.61  | -60.21  | EBF    | 2003-01-02 | 2005-10-15 | y          | y (1,2,3,4) |
| LBA-K67 | -2.85  | -54.97  | EBF    | 2002-01-02 | 2003-11-18 | y          | y (1,2)     |
| LBA-K77 | -3.02  | -54.89  | C4G    | 2001-01-02 | 2005-12-31 |            |             |
| LBA-K83 | -3.05  | -54.93  | EBF    | 2001-01-02 | 2003-08-12 | y          | y (1,2)     |
| LBA-PDG | -21.62 | -47.63  | DecSav | 2002-01-02 | 2003-12-31 |            |             |
| LBA-RJA | -10.08 | -62.36  | EBF    | 2000-02-03 | 2002-09-13 | y          | y (1,2,3,4) |
| AT-Neu  | 47.12  | 11.32   | GRA    | 2006-12-17 | 2012-12-30 | y          | y (1,2)     |
| AU-Fog  | -12.55 | 131.31  | WET    | 2006-01-01 | 2008-12-31 |            |             |
| BE-Vie  | 50.31  | 6.00    | MF     | 1996-07-18 | 2006-12-31 | y          | y (1,2,3)   |
| CA-Oas  | 53.63  | -106.20 | DBF    | 1996-01-02 | 2010-12-31 |            |             |
| CG-Tch  | -4.29  | 11.66   | SAV    | 2006-01-01 | 2009-12-30 |            |             |
| CH-CHA  | 47.21  | 8.41    | GRA    | 2006-01-01 | 2007-12-30 | y          | y (1,2,3)   |
| CN-HaM  | 37.37  | 101.18  | GRA    | 2002-01-01 | 2004-12-30 |            | y (1)       |
| DE-Tha  | 50.96  | 13.57   | ENF    | 1996-01-01 | 2014-12-30 |            |             |
| FI-Hyy  | 61.85  | 24.30   | ENF    | 1996-12-19 | 2014-12-30 |            | y (1,2,3)   |
| GF-Guy  | 5.28   | -52.92  | EBF    | 2007-01-02 | 2009-12-30 | y          | y (1,2,3,4) |
| IT-CA1  | 42.38  | 12.03   | DBF    | 2012-02-16 | 2012-12-30 | y          | y (1,2,3)   |
| IT-Col  | 41.85  | 13.59   | DBF    | 1996-01-01 | 2014-12-30 |            |             |
| IT-Ren  | 46.59  | 11.43   | ENF    | 1999-01-01 | 2013-12-30 | y          | y (1,2)     |
| RU-Che  | 68.61  | 161.34  | WET    | 2002-01-01 | 2005-12-30 |            |             |
| RU-SkP  | 62.26  | 129.17  | DNF    | 2012-01-01 | 2014-12-30 |            |             |
| SD-Dem  | 13.28  | 30.48   | SAV    | 2007-07-06 | 2009-12-30 |            | y (1,2,3,4) |
| US-Ha1  | 42.54  | -72.17  | DBF    | 1991-01-02 | 2012-12-31 |            |             |
| US-MMS  | 39.32  | -86.41  | DBF    | 1999-01-02 | 2014-12-31 |            |             |
| US-Ne1  | 41.17  | -96.48  | CRO    | 2001-06-19 | 2012-12-31 | y          | y (1,2,3)   |
| US-Ne2  | 41.16  | -96.47  | CRO    | 2001-06-19 | 2012-12-31 | y          | y (1,2,3)   |
| US-Ne3  | 41.18  | -96.44  | CRO    | 2001-06-19 | 2012-12-31 | y          | y (1,2,3)   |
| US-PFa  | 45.95  | -90.27  | MF     | 1995-01-02 | 2014-12-31 |            |             |
| US-SRG  | 31.79  | -110.83 | GRA    | 2008-03-08 | 2014-12-31 |            | y (1,2,3)   |
| US-SRM  | 31.82  | -110.87 | WSA    | 2004-01-02 | 2014-12-31 |            | y (1,2,3,4) |
| US-Ton  | 38.43  | -120.97 | WSA    | 2001-01-02 | 2014-12-31 |            |             |
| US-UMB  | 45.56  | -84.71  | DBF    | 2009-08-17 | 2014-12-31 |            | y (1,2,3,4) |
| US-Var  | 38.41  | -120.95 | GRA    | 2000-01-02 | 2014-12-31 |            |             |
| US-WCr  | 45.81  | -90.08  | DBF    | 1999-01-02 | 2014-12-31 |            |             |
| US-Whs  | 31.74  | -110.05 | OSH    | 2007-01-02 | 2014-12-31 |            |             |
| US-Wkg  | 31.74  | -109.94 | GRA    | 2004-01-02 | 2014-12-31 |            |             |
| ZA-Kru  | -25.02 | 31.50   | SAV    | 2000-04-01 | 2013-03-01 |            | y (1,2,3)   |
| ZM-Mon  | -15.44 | 23.25   | DBF    | 2000-01-01 | 2009-12-30 |            |             |

Sites broken into climate and biome category (Fig 3-4 and SM Fig 1-3)

**Tropics**

**Tropical evergreen forests:**

LBA-K34, LBA-K67, LBA-K83, GF-Gui

**Tropical grasslands:**

LBA-K77, LBA-PDG, LBA-FNS, AU-Fog

**Tropical dry forests:**

LBA-BAN, LBA-RJA, ZM\_Mon

**Tropical savannahs:**

SD-Dem, ZA-Kru

**Boreal/Cold sites**

**Boreal forests:**

FI-Hyy, RU-SkP, CA-Oas

**Continental/high altitude grasslands:**

AT-Neu, CH-Cha, CN-HaM, RU-Che

**Temperate sites:**

**Temperate Mixed Forests:**

BE-Vie, IT-CA1, IT-Col, IT-Ren, US-UMB, US-Wcr, US-Ha1, US-MMS, DE-Tha

**Temperate grasslands:**

US-SRG, US-Wkg, US-Var

**Temperate savannahs:**

US-SRM, US-Whs, US-Ton

**Crops:**

US-Ne1, US-Ne2, US-Ne3

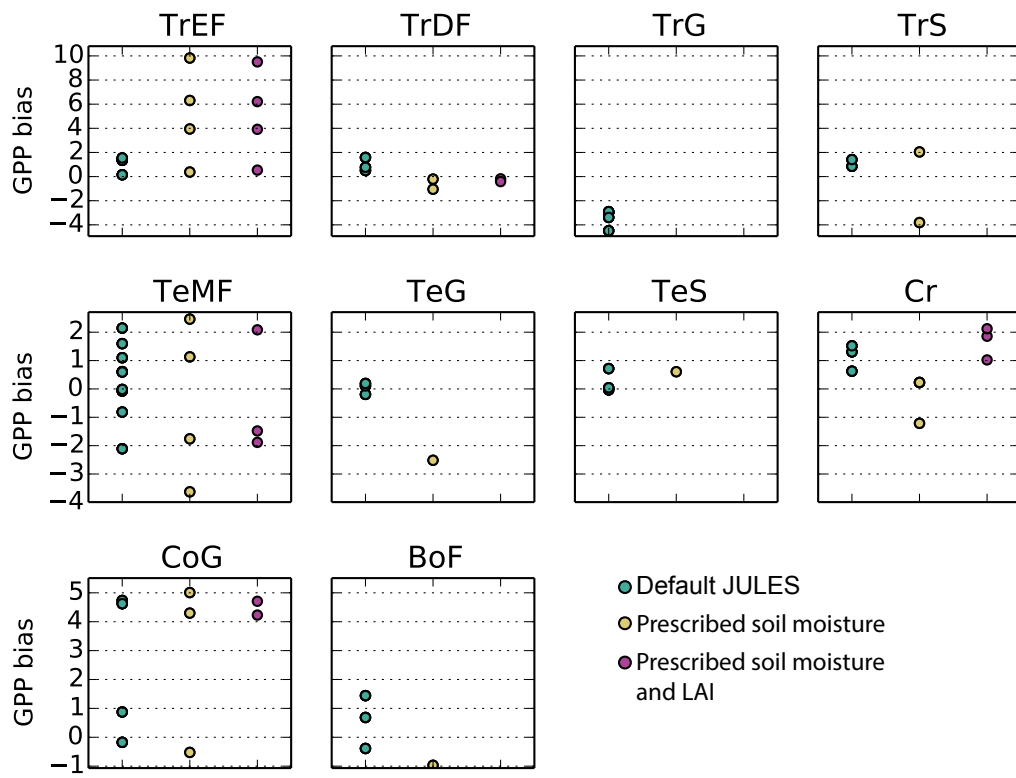

Figure SM1: Root mean bias for GPP per biome

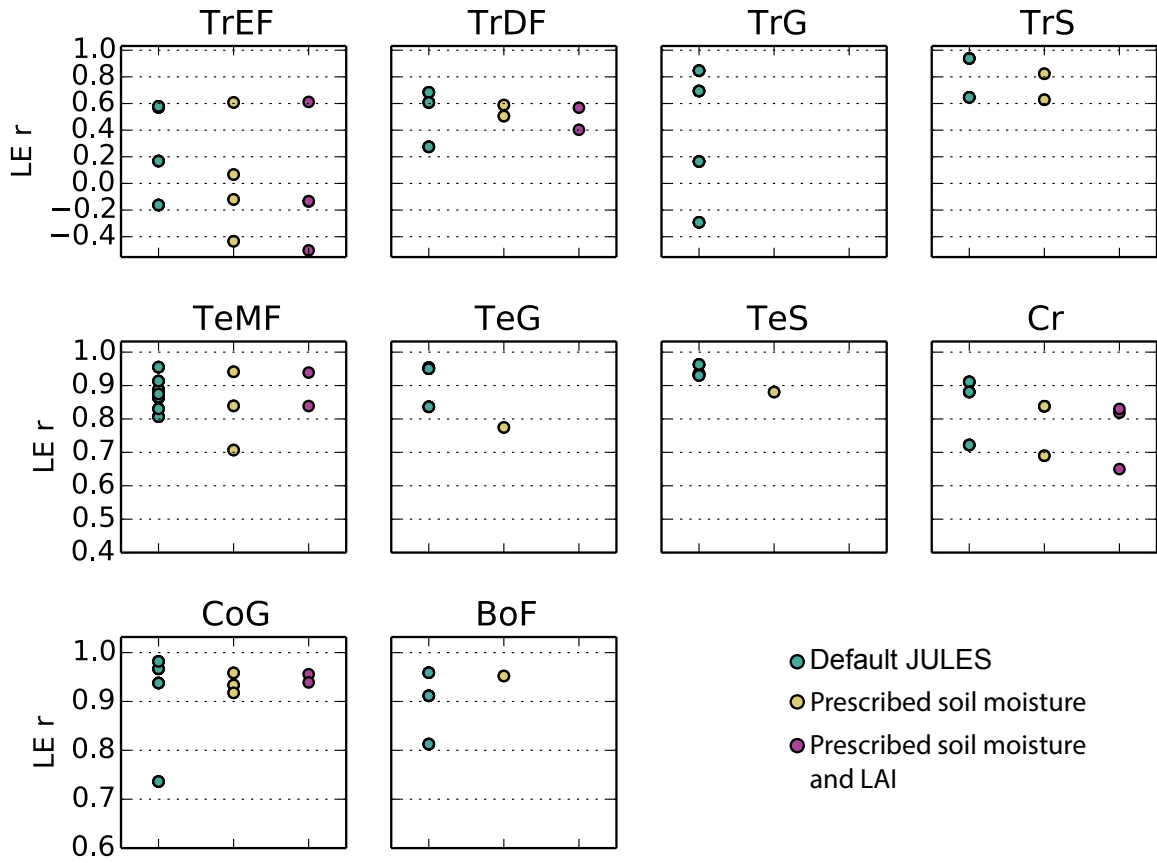

Figure SM2:  $r$  for LE per biome

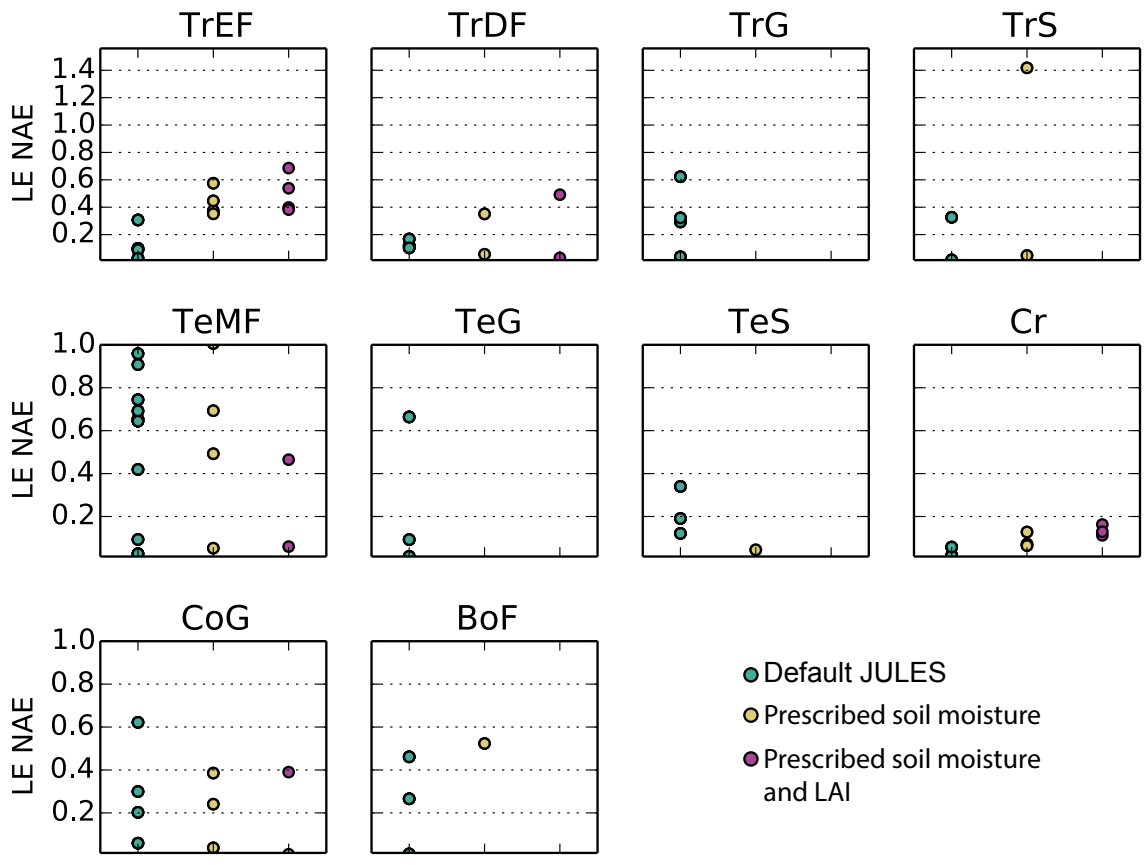

Figure SM3: NAE for LE per biome

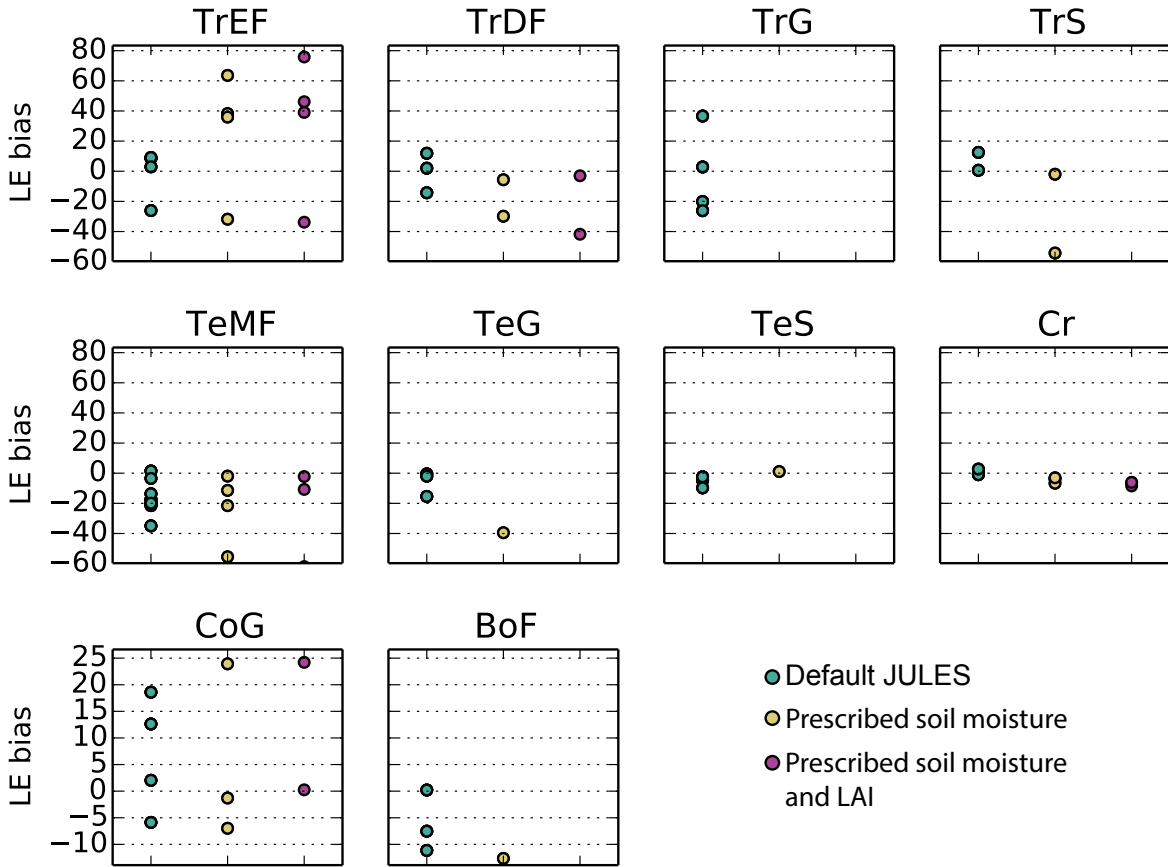

Figure SM4: Root mean bias for LE per biome

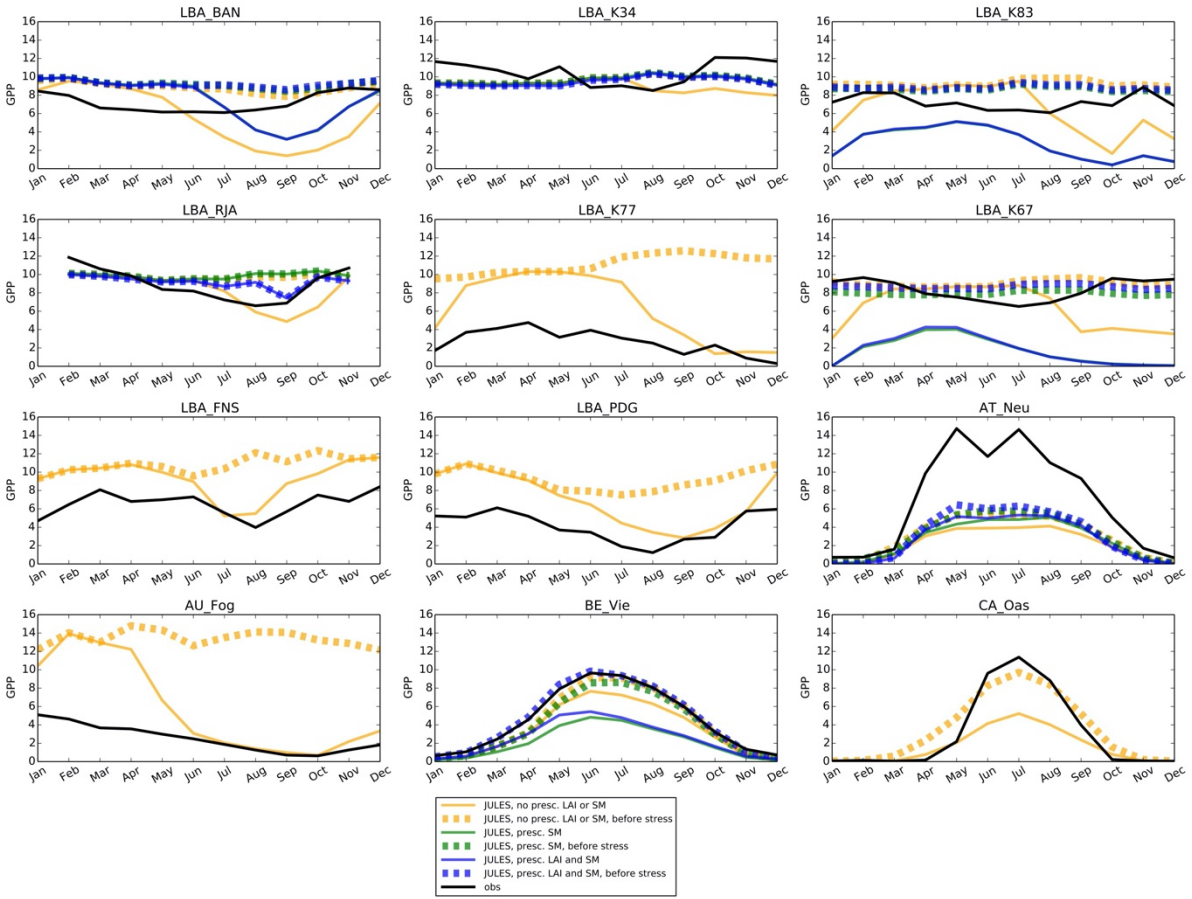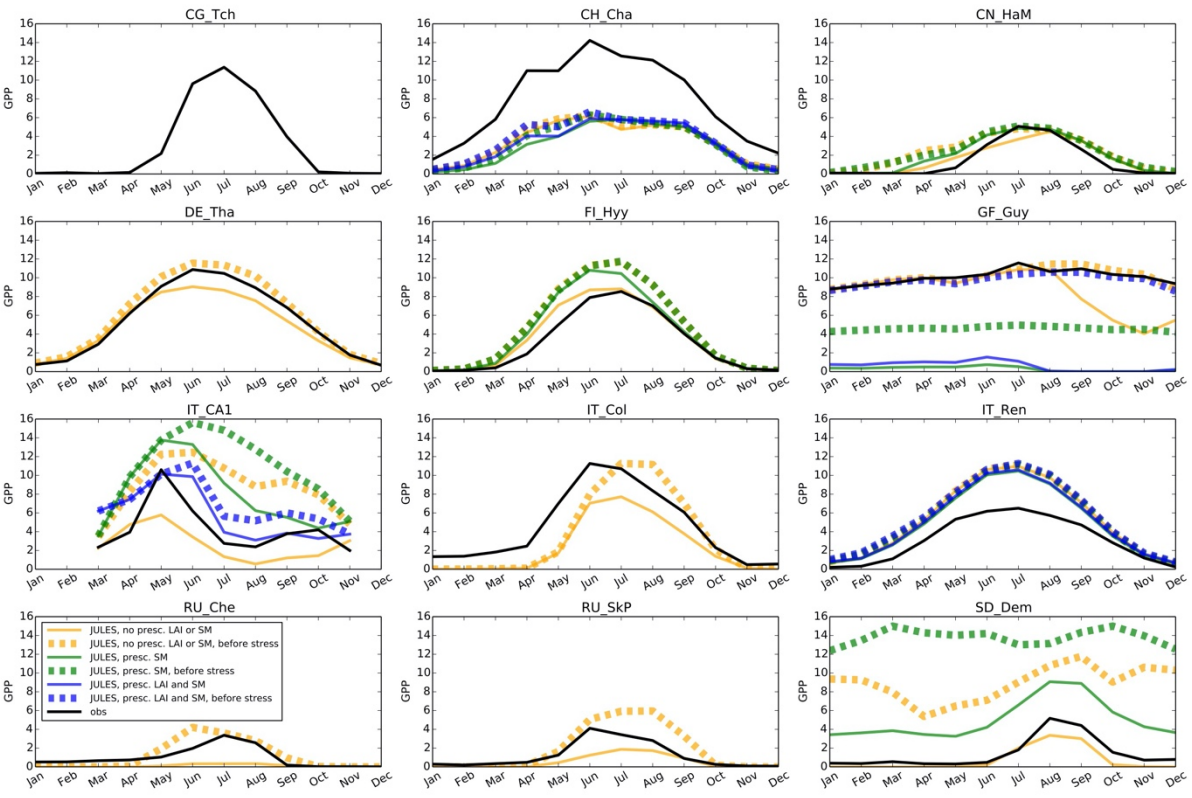



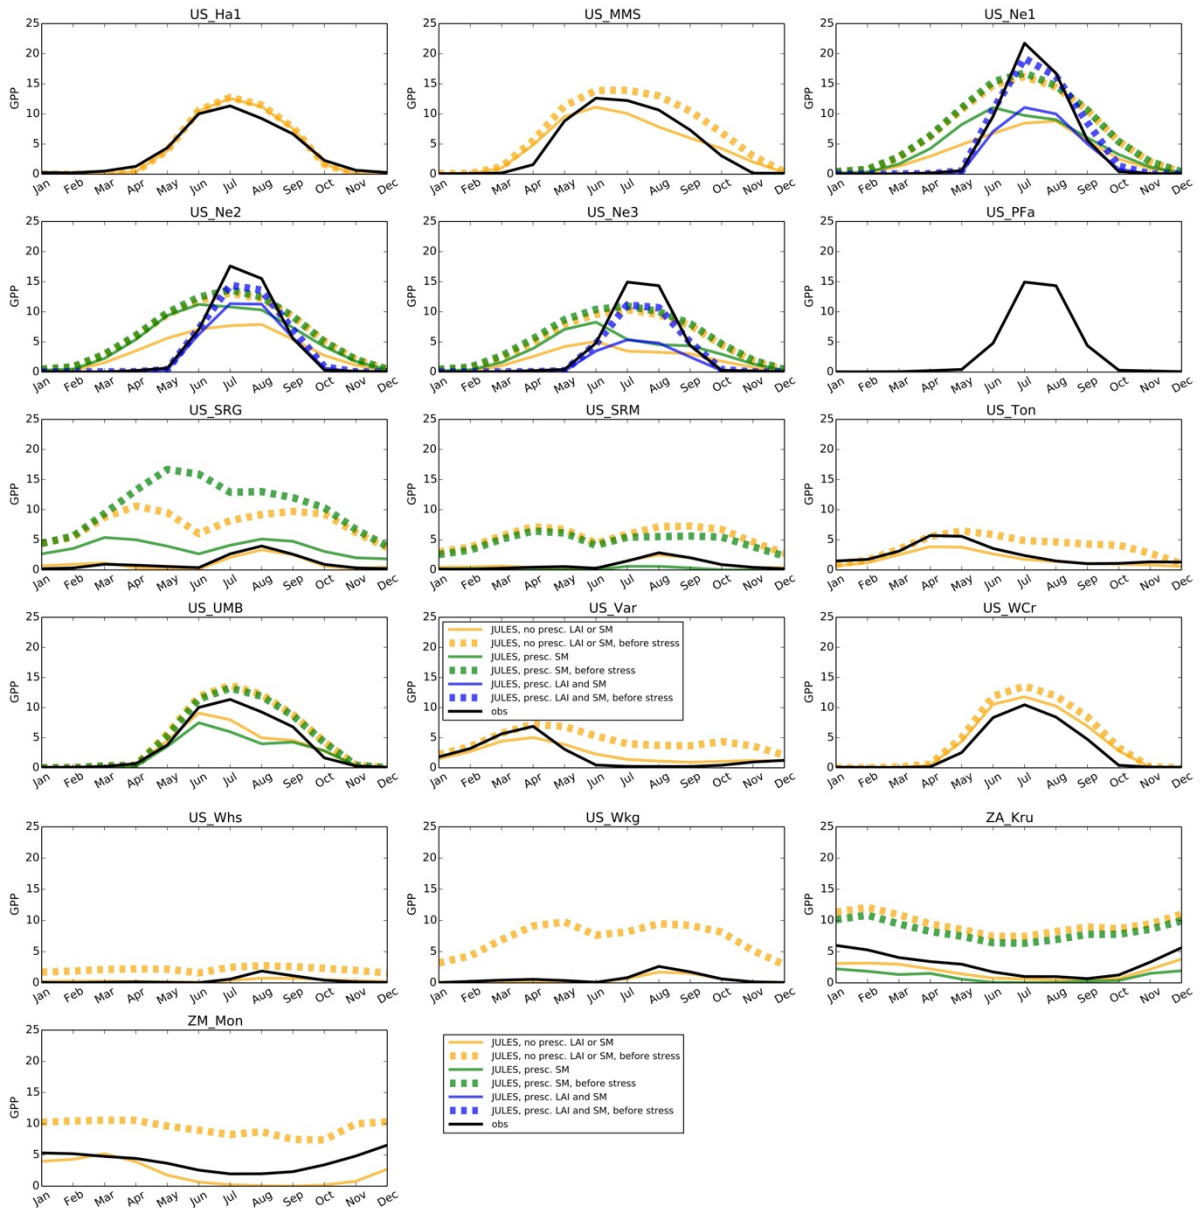

Figure SM5: GPP and unstressed GPP for all sites with and without prescribed data

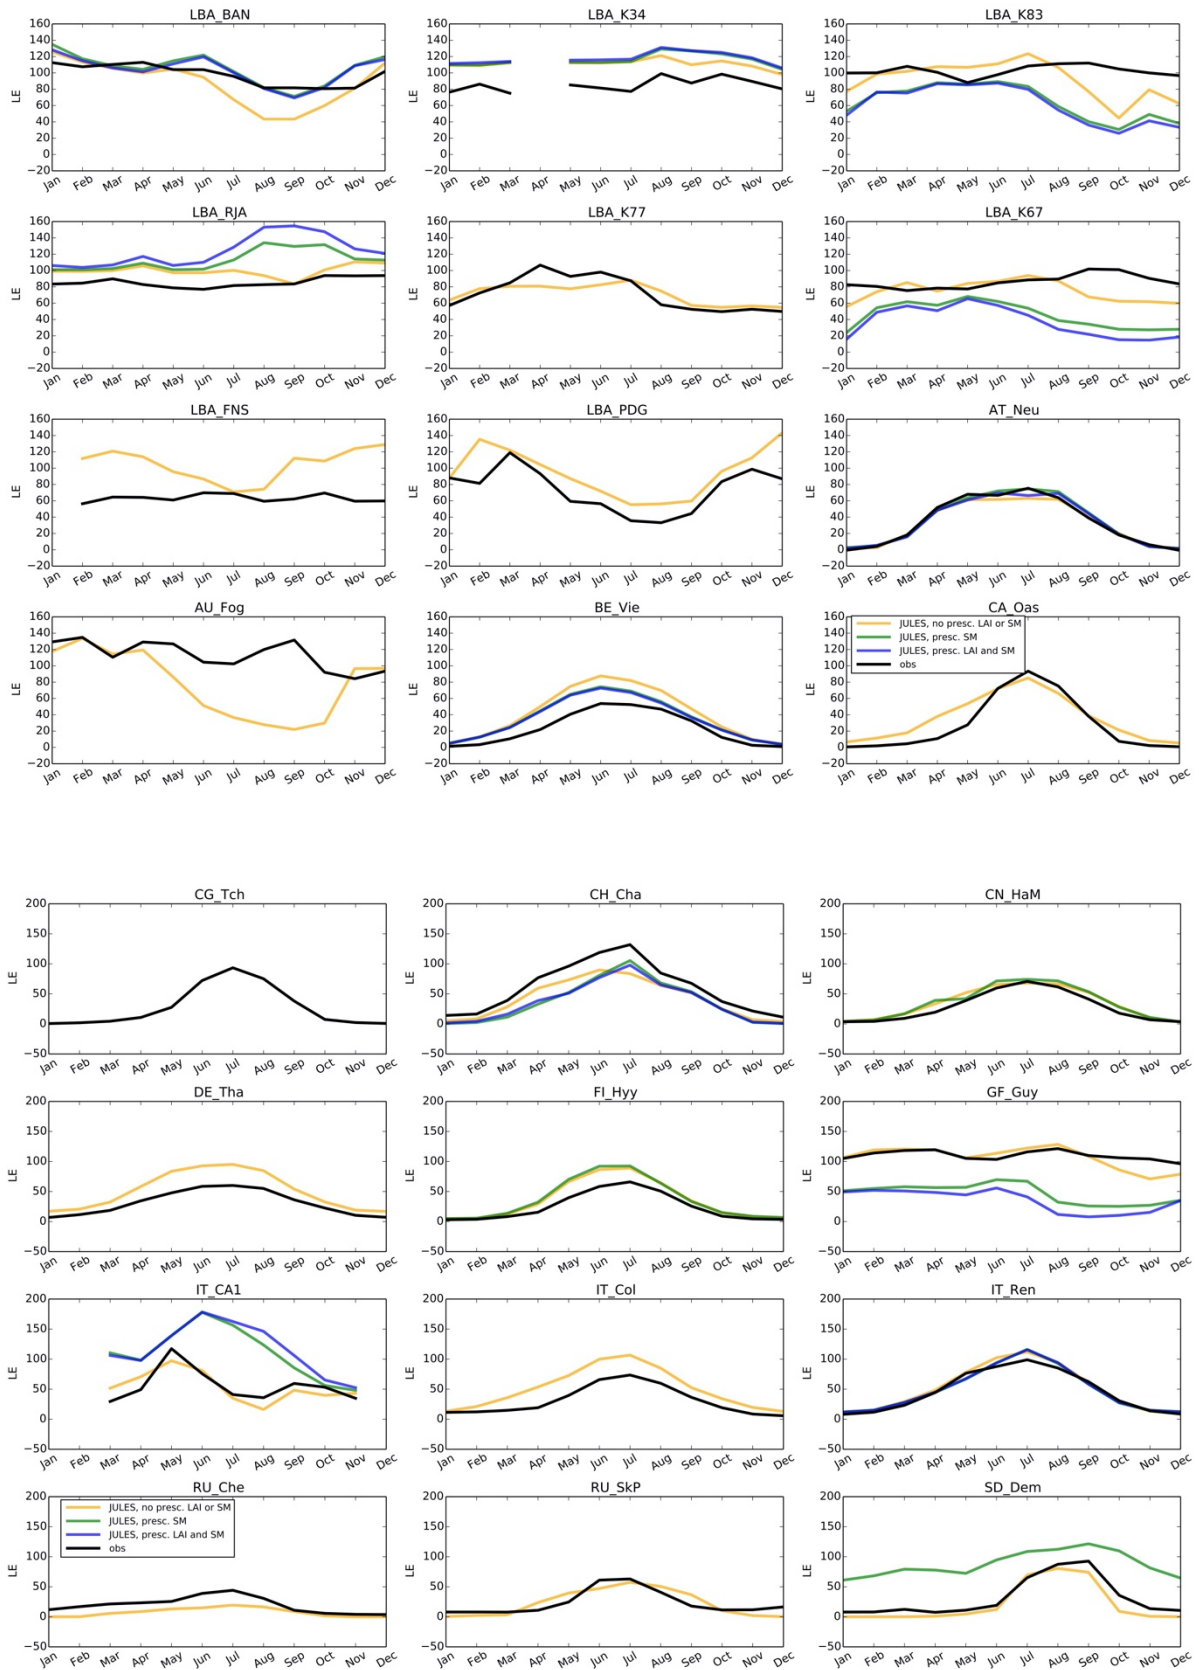

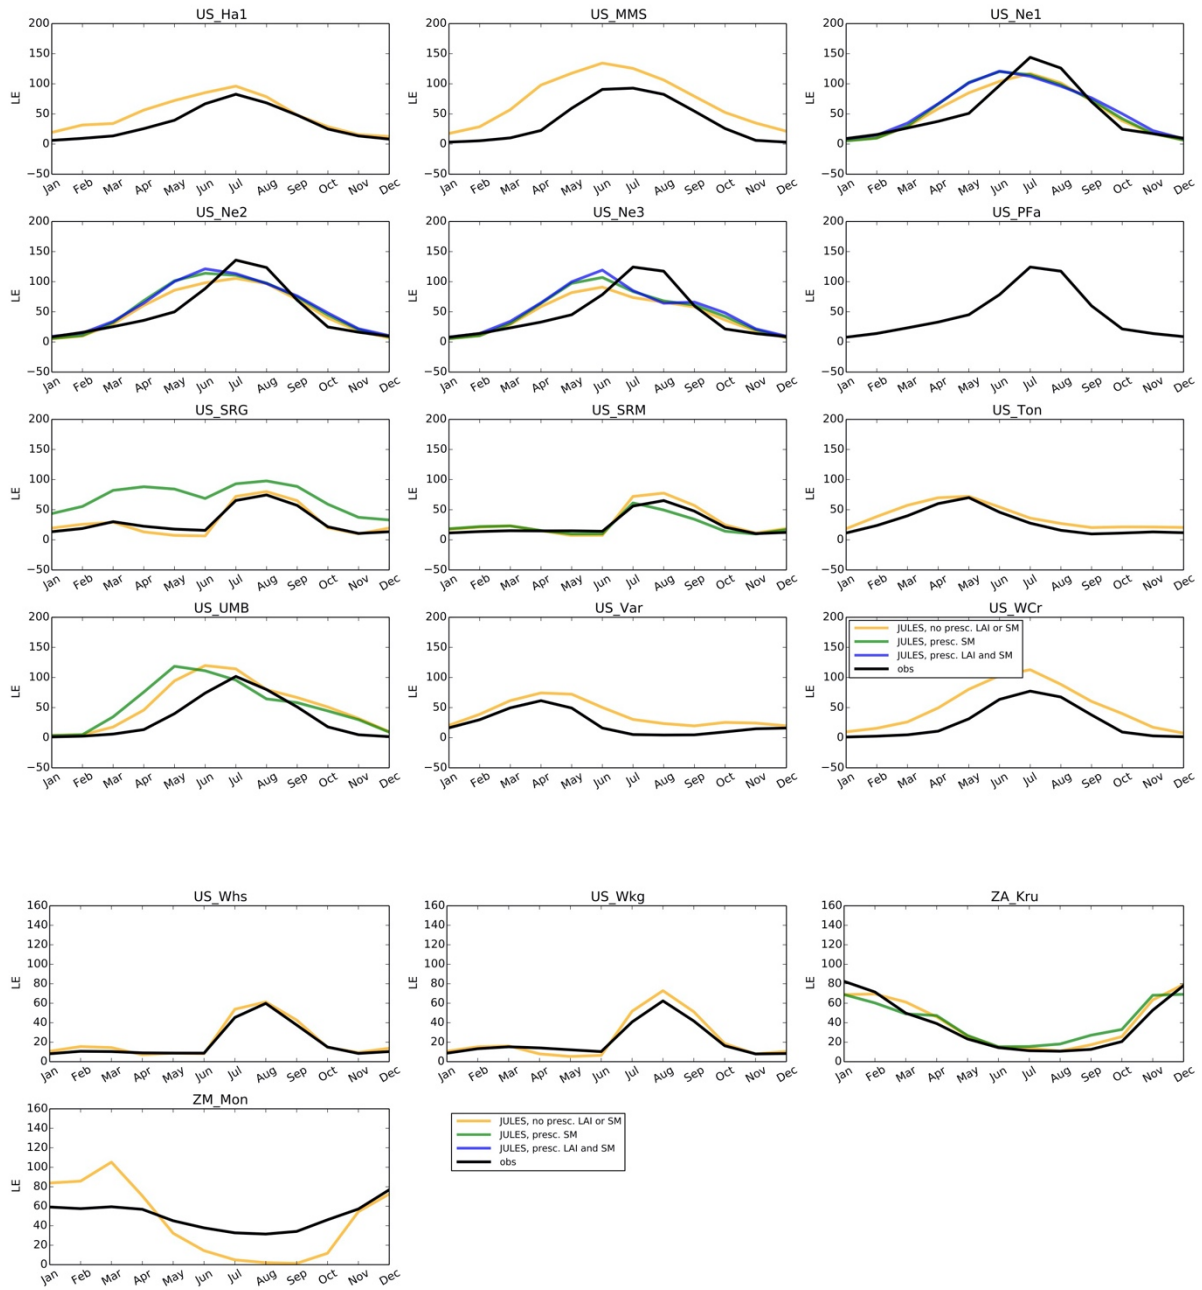

Figure SM6: LE for all sites with and without prescribed data

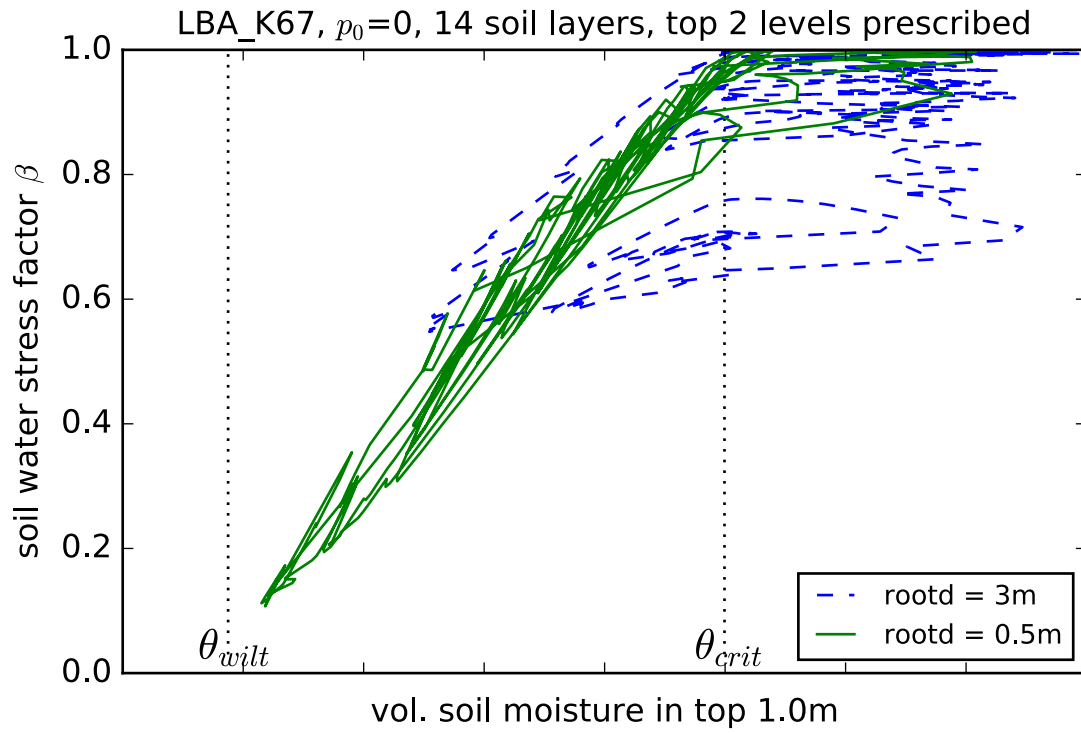

Figure SM7: LBA-K67 stress vs soil moisture

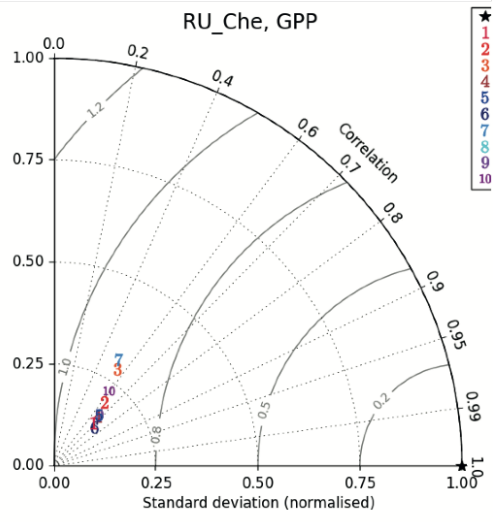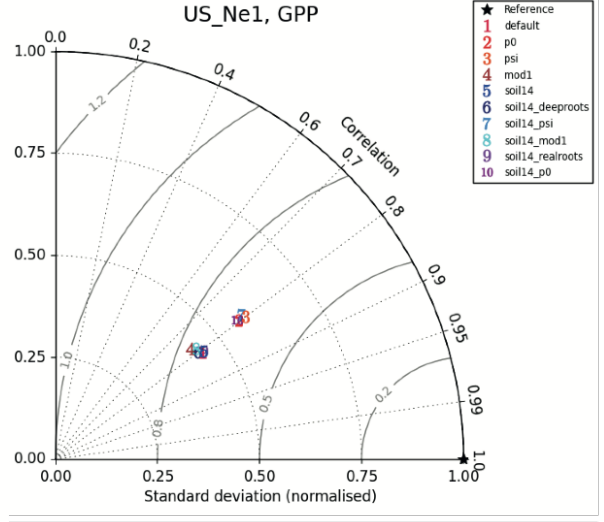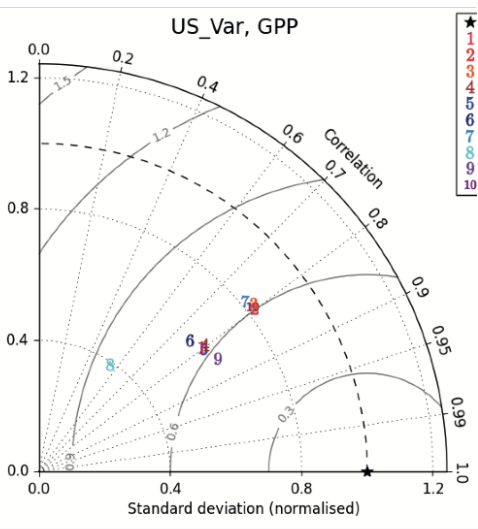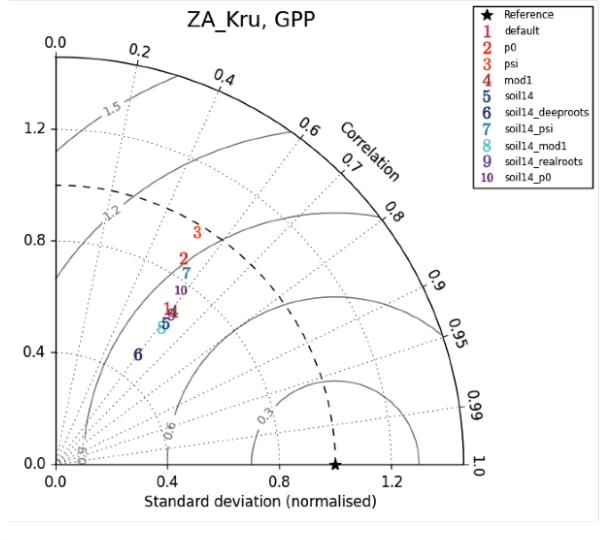

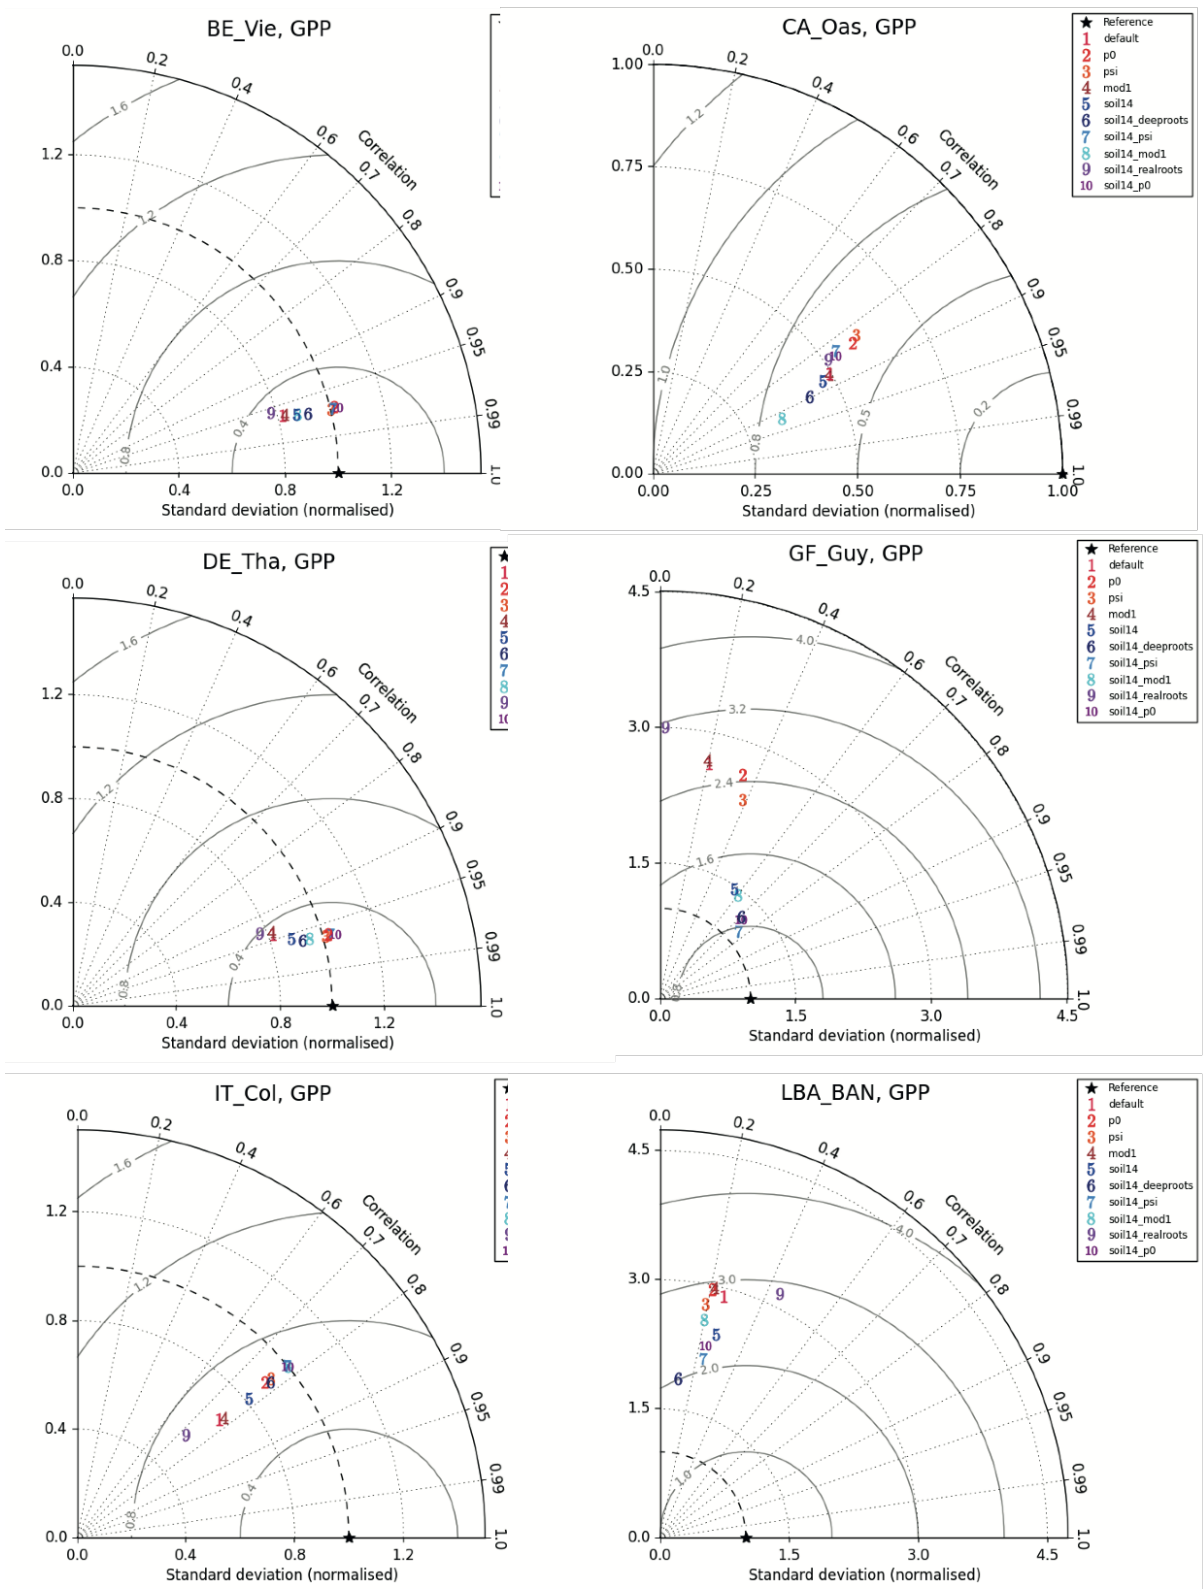

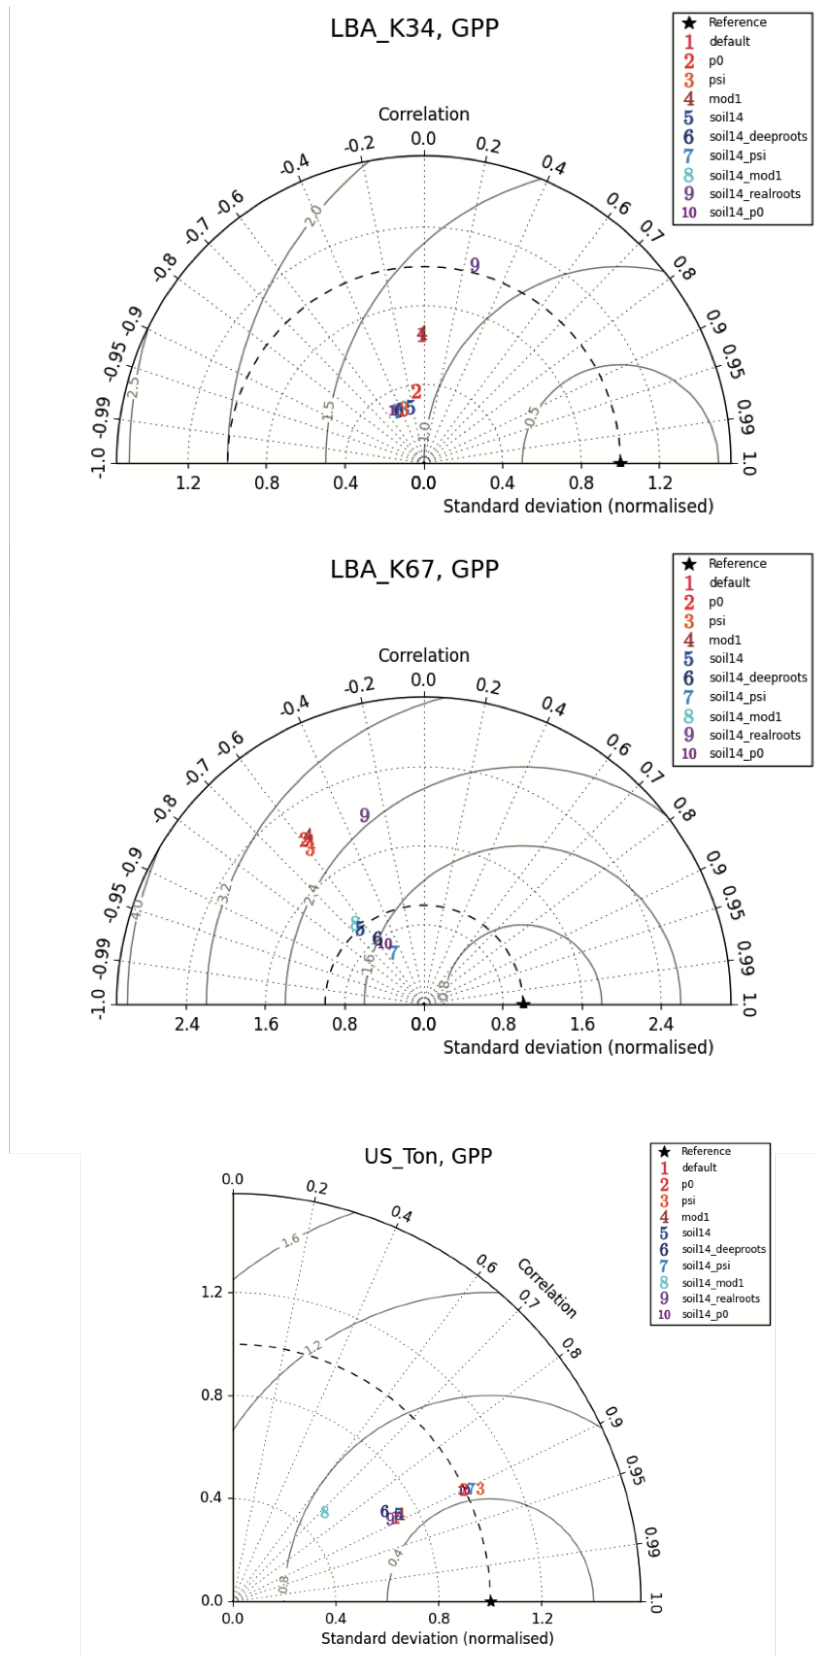

Figure SM8: Taylor Diagrams for all sites with soil experiments for GPP

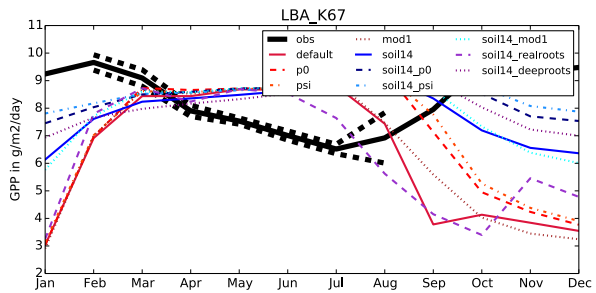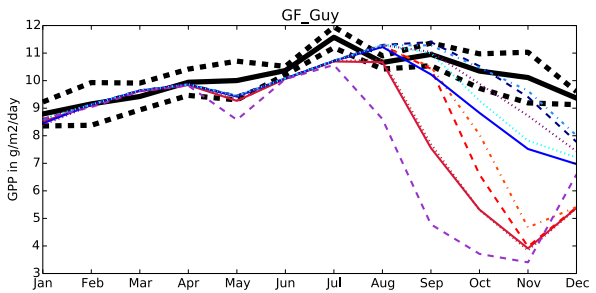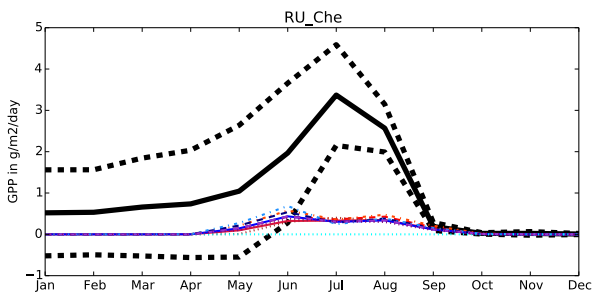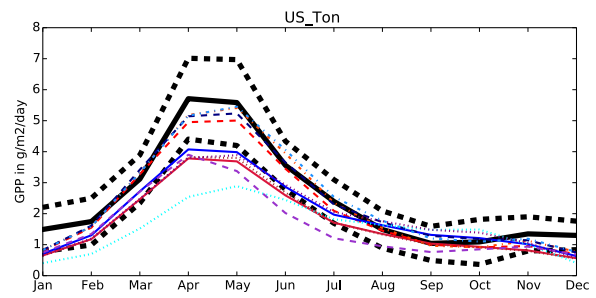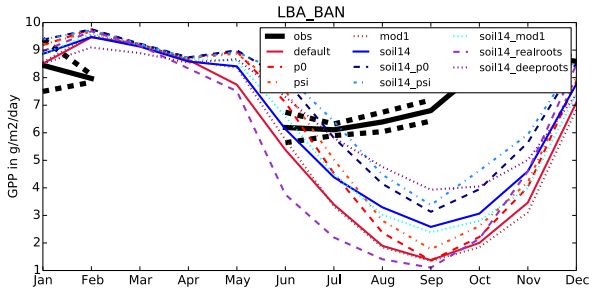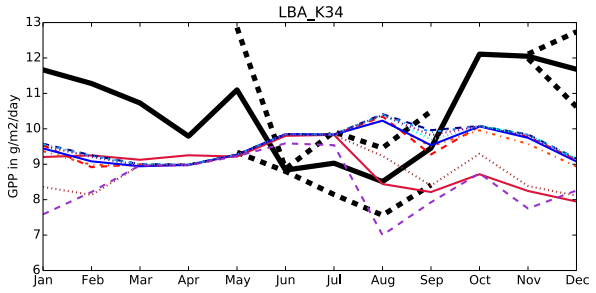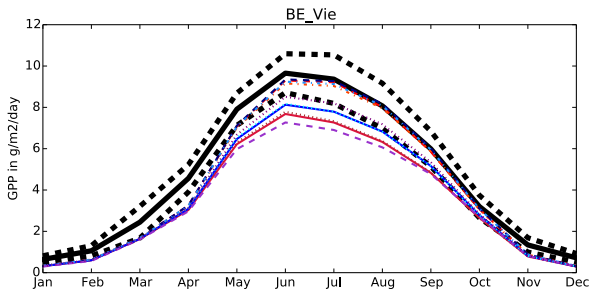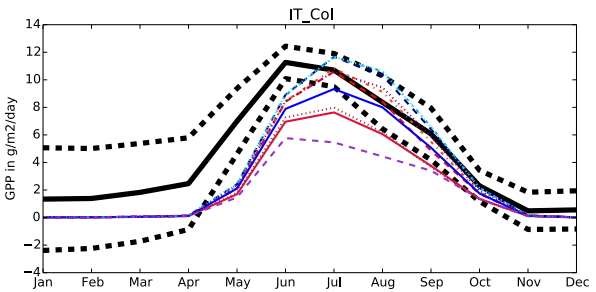



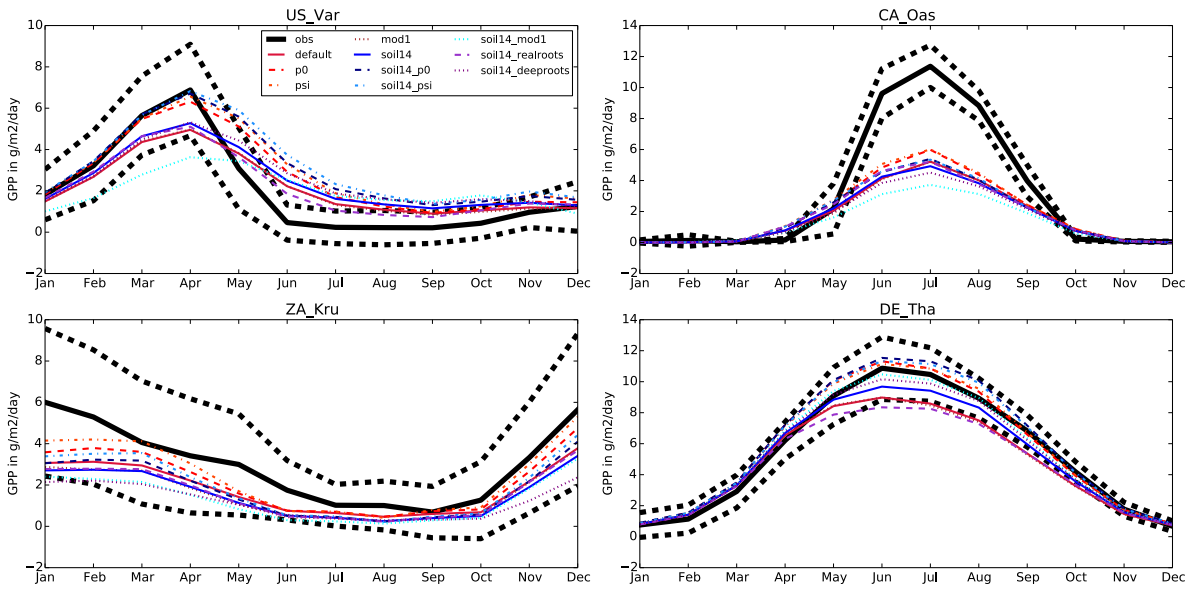

Figure SM9: Seasonal cycle of GPP for all sites with soil experiments

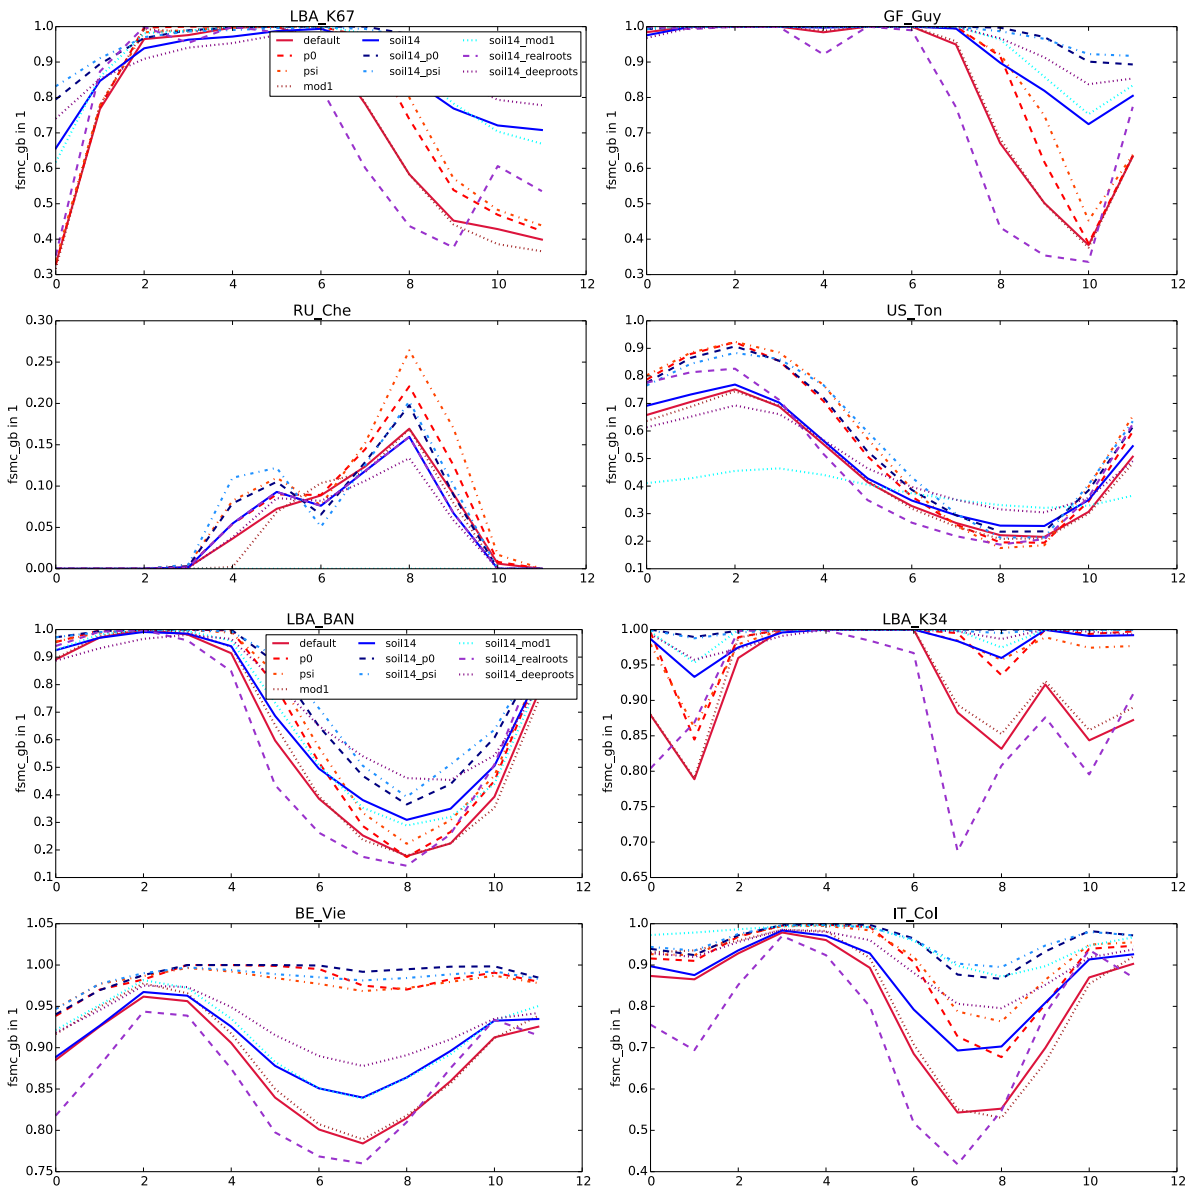

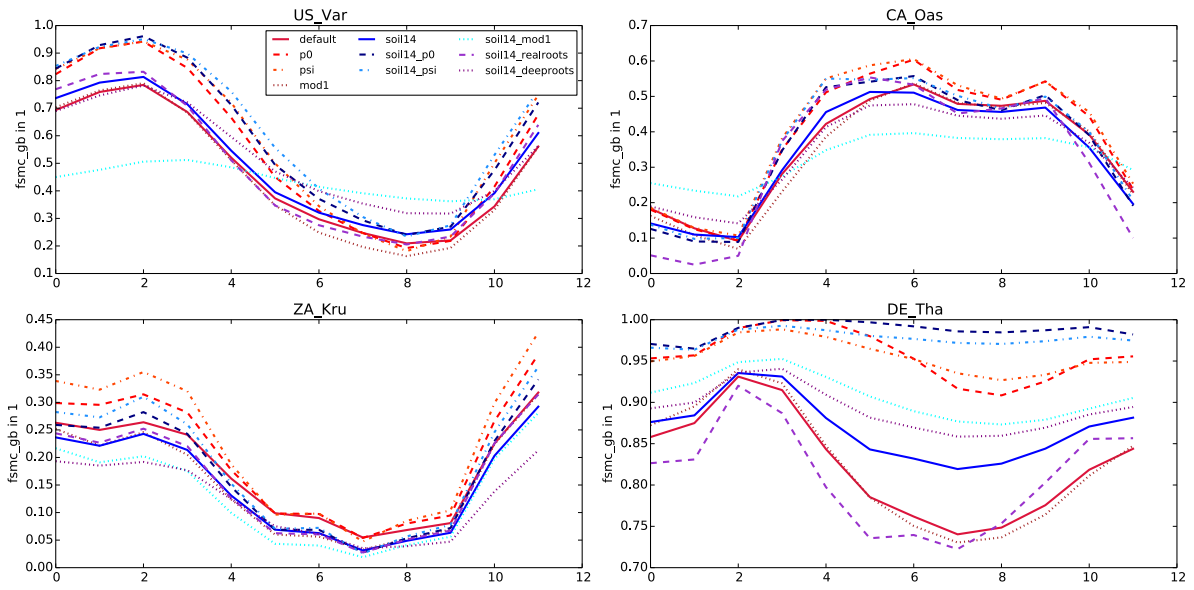

Figure SM10: Seasonal cycle of soil moisture stress factor for all sites with soil experiments.

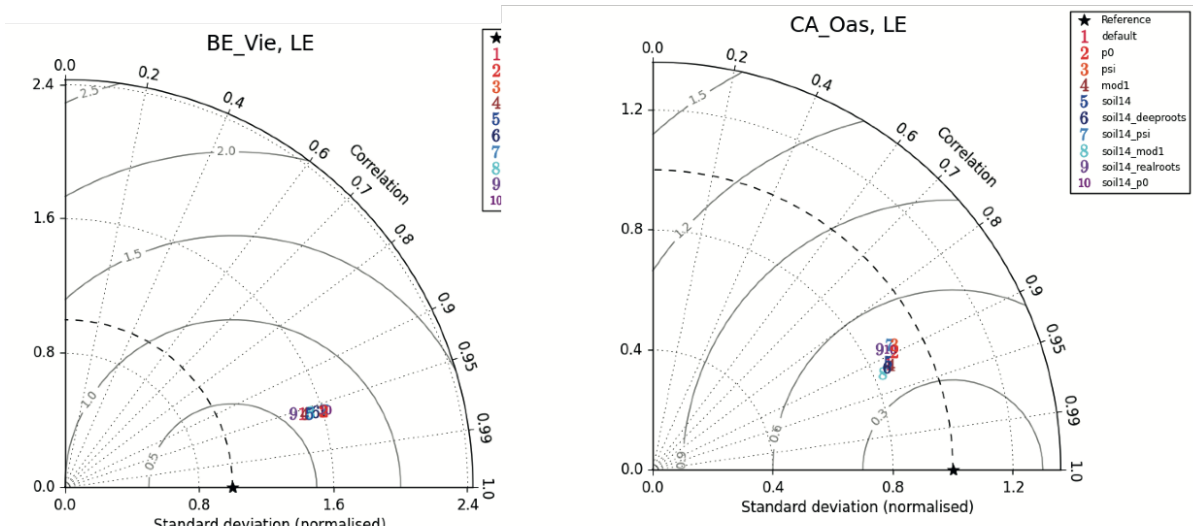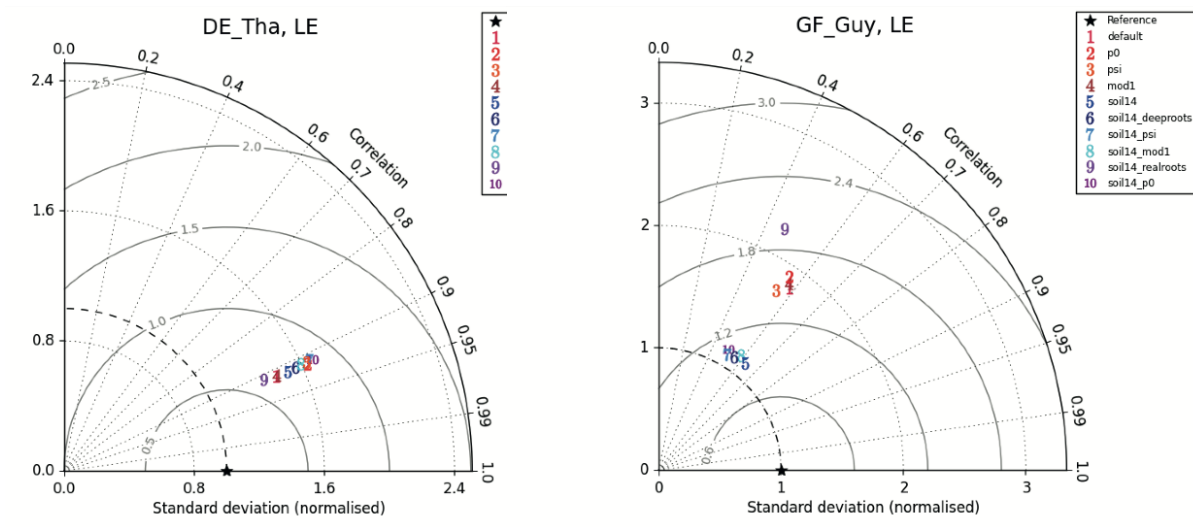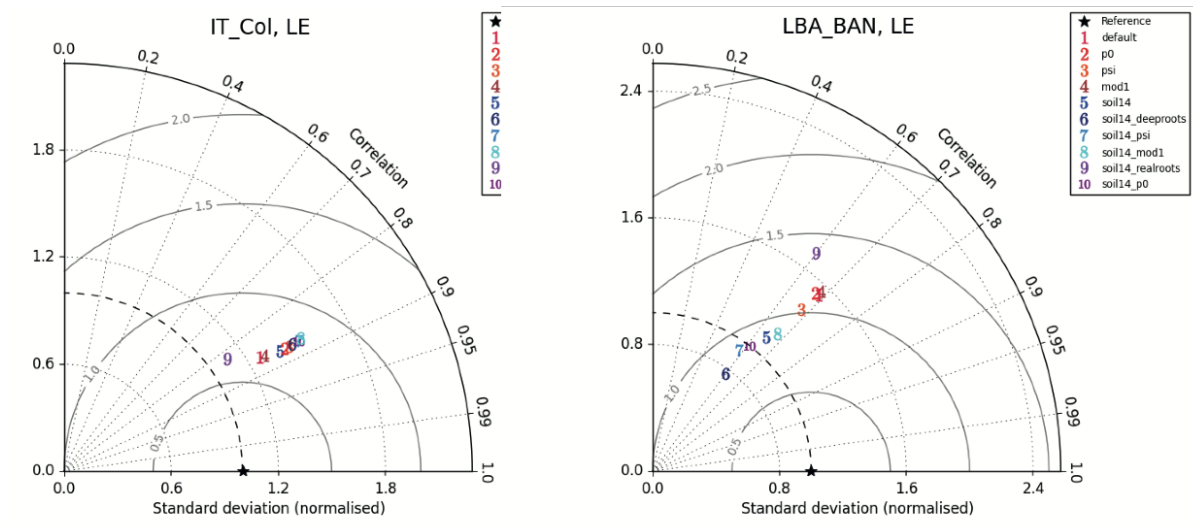

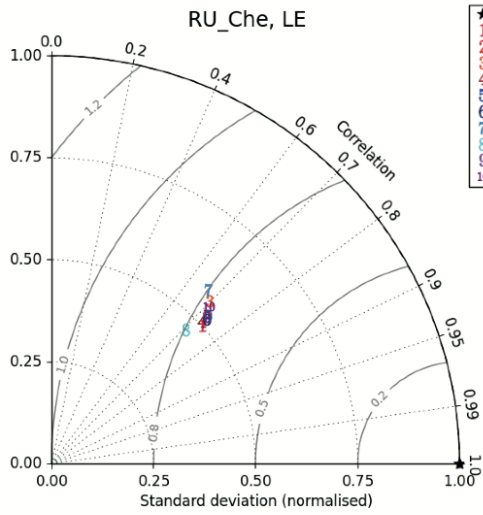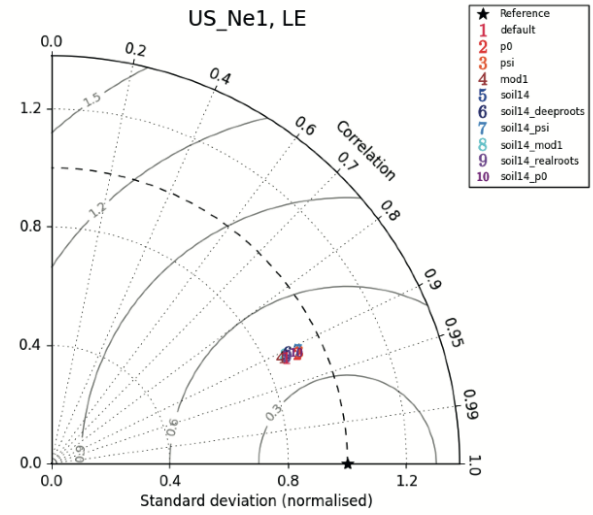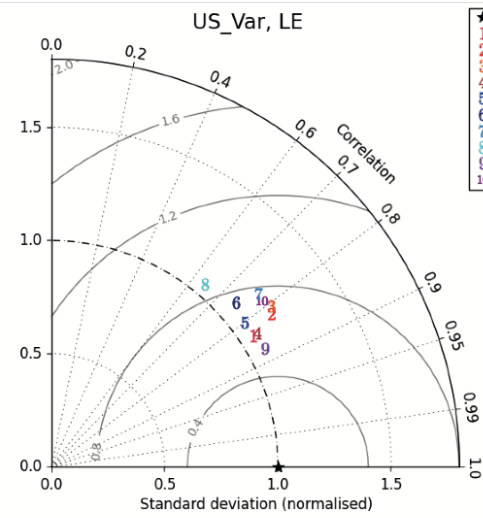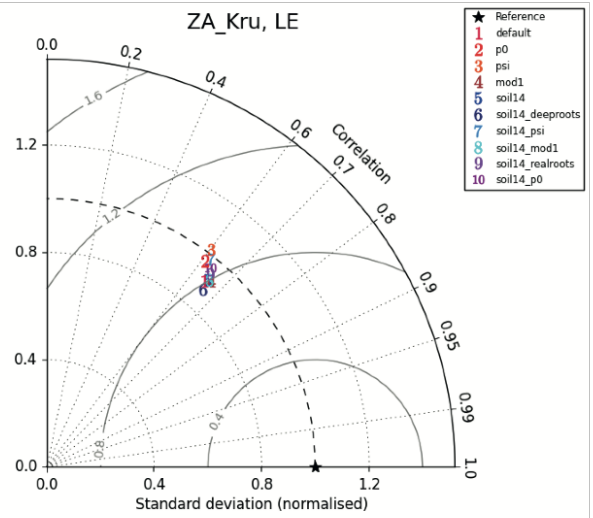

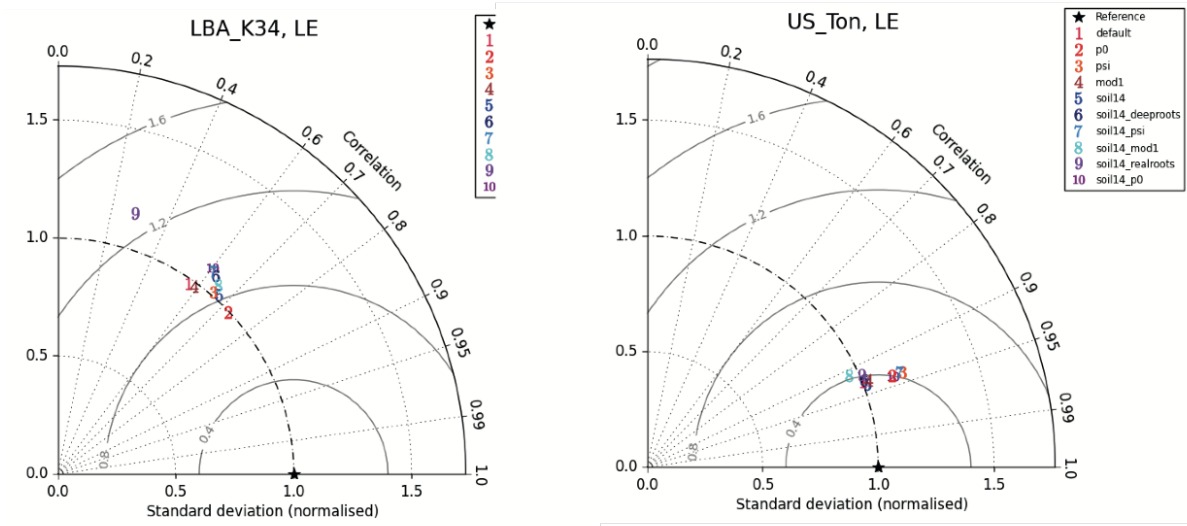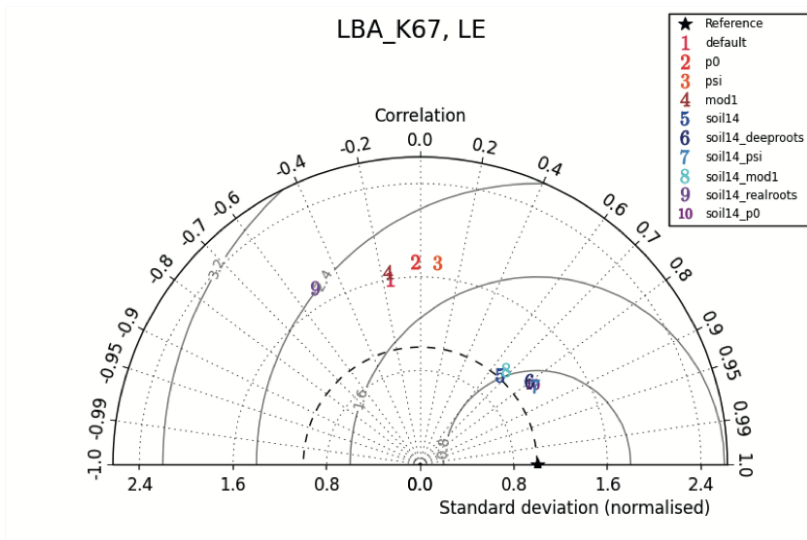

Figure SM11: Taylor Diagrams for all sites with soil experiments for LE

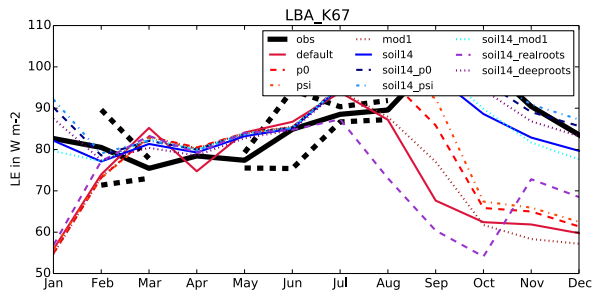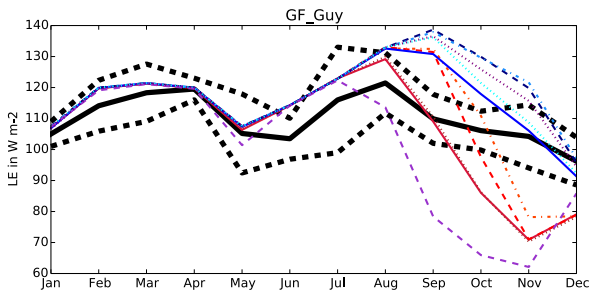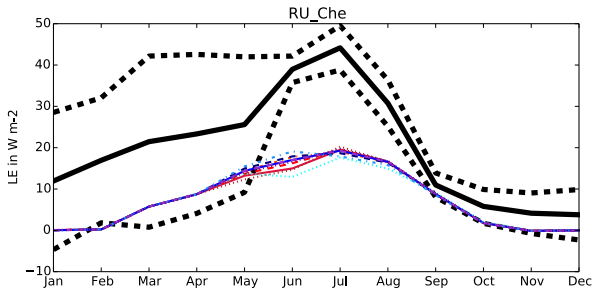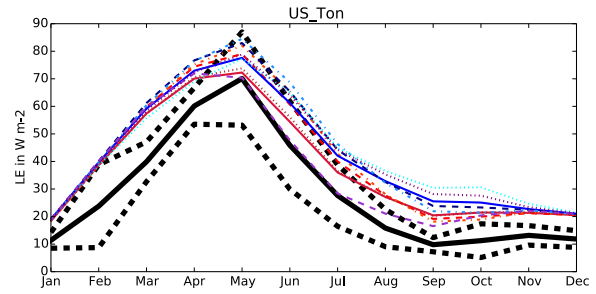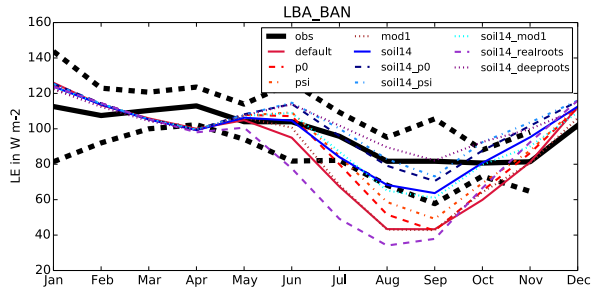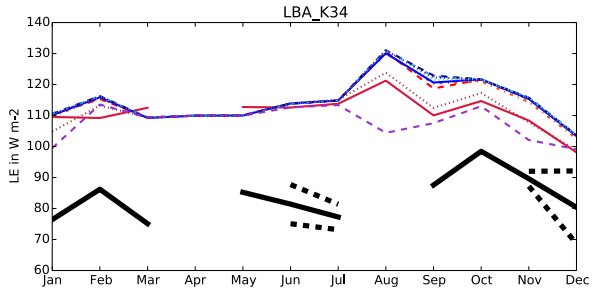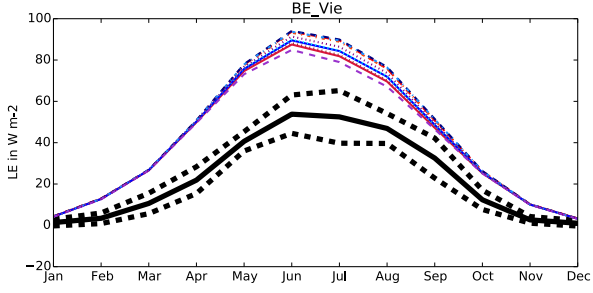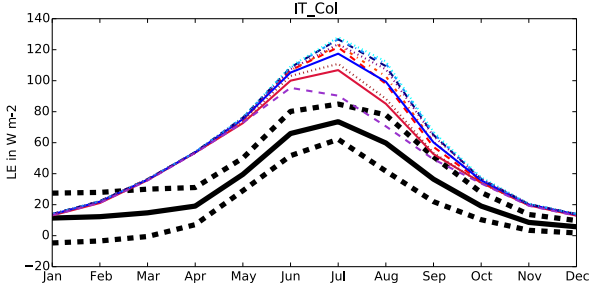

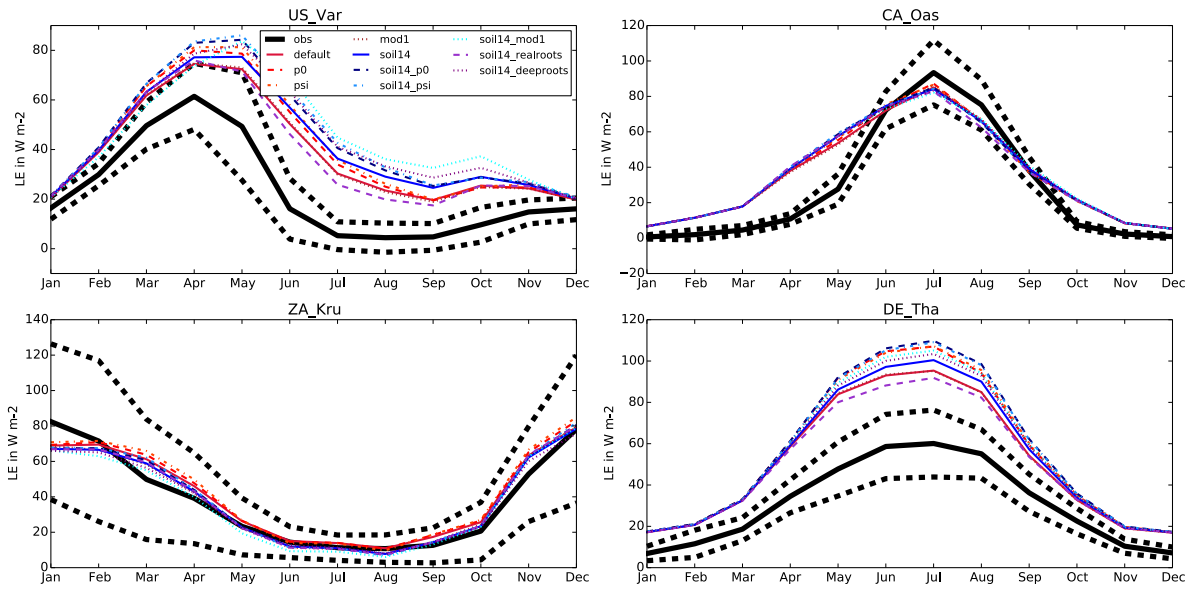

Figure SM12: Seasonal cycle of LE for all sites with soil experiments



References for each site:

Pastorello et al., 2020. The FLUXNET2015 dataset and the ONEFlux processing pipeline for eddy covariance data. *Scientific data*, 7:225; <https://doi.org/10.1038/s41597-020-0534-3>

AT-Nue: [10.18140/FLX/1440121](https://doi.org/10.18140/FLX/1440121)  
AU-Fog: [10.18140/FLX/1440124](https://doi.org/10.18140/FLX/1440124)  
BE-Vie: [10.18140/FLX/1440130](https://doi.org/10.18140/FLX/1440130)  
CA-OAs: [10.18140/FLX/1440043](https://doi.org/10.18140/FLX/1440043)  
CG-Tch: [10.18140/FLX/1440142](https://doi.org/10.18140/FLX/1440142)  
CH-Cha: [10.18140/FLX/1440131](https://doi.org/10.18140/FLX/1440131)  
CN-HaM [10.18140/FLX/1440190](https://doi.org/10.18140/FLX/1440190)  
DE-Tha: [10.18140/FLX/1440152](https://doi.org/10.18140/FLX/1440152)  
FI-Hyy: [10.18140/FLX/1440158](https://doi.org/10.18140/FLX/1440158)  
GF-Guy: [10.18140/FLX/1440165](https://doi.org/10.18140/FLX/1440165)  
IT-CA1: [10.18140/FLX/1440230](https://doi.org/10.18140/FLX/1440230)  
IT-Col: [10.18140/FLX/1440167](https://doi.org/10.18140/FLX/1440167)  
IT-Ren: [10.18140/FLX/1440173](https://doi.org/10.18140/FLX/1440173)  
RU-Che: [10.18140/FLX/1440181](https://doi.org/10.18140/FLX/1440181)  
RU-SkP: [10.18140/FLX/1440243](https://doi.org/10.18140/FLX/1440243)  
SD-Dem: [10.18140/FLX/1440186](https://doi.org/10.18140/FLX/1440186)  
US-Ha1: [10.18140/FLX/1440071](https://doi.org/10.18140/FLX/1440071)  
US-MMS: [10.18140/FLX/1440083](https://doi.org/10.18140/FLX/1440083)  
US-Ne1: [10.18140/FLX/1440084](https://doi.org/10.18140/FLX/1440084)  
US-PFa: [10.18140/FLX/1440089](https://doi.org/10.18140/FLX/1440089)  
US-SRG: [10.18140/FLX/1440114](https://doi.org/10.18140/FLX/1440114)  
US-SRM: [10.18140/FLX/1440090](https://doi.org/10.18140/FLX/1440090)  
US-Ton: [10.18140/FLX/1440092](https://doi.org/10.18140/FLX/1440092)  
US-Var: [10.18140/FLX/1440094](https://doi.org/10.18140/FLX/1440094)  
US-WCr: [10.18140/FLX/1440095](https://doi.org/10.18140/FLX/1440095)  
US-Whs: [10.18140/FLX/1440097](https://doi.org/10.18140/FLX/1440097)  
US-Wkg: [10.18140/FLX/1440096](https://doi.org/10.18140/FLX/1440096)  
ZA-Kru: [10.18140/FLX/1440188](https://doi.org/10.18140/FLX/1440188)  
ZM-Mon: [10.18140/FLX/1440189](https://doi.org/10.18140/FLX/1440189)

Further list of site references:

#### **SD-DEM**

Ardö, J., Mölder, M., El-Tahir, B. A. and Elkhidir, H. A. M.: Seasonal variation of carbon fluxes in a sparse savanna in semi arid Sudan, *Carbon Balance Manag.*, 3, 7, 2008.

<http://www.fluxdata.org:8080/sitepages/siteInfo.aspx?SD-Dem>

#### **CG-Tch**

1. Akkermans, T., Lauwaet, D., Demuzere, M., Vogel, G., Nouvellon, Y., Ardö, J., Caquet, B., De Grandcourt, A., Merbold, L., Kutsch, W. et al., 2012. Validation and comparison of two soil-vegetation-atmosphere transfer models for tropical Africa. *Journal of Geophysical Research: Biogeosciences*, 117(2), Doi 10.1029/2011JG001802

2. Caquet B., De Grandcourt A., Thongo M'bou A., Epron D., Kinana, A., Saint André L., Nouvellon Y., 2012. Soil carbon balance in a tropical grassland: estimation of soil respiration and its partitioning using a semi-empirical model. *Agricultural and Forest Meteorology*, 158– 159:71–79.
3. Zhang, Y., Xiao, X., Zhang, Y., Wolf, S., Zhou, S., Joiner, J., Guanter, L., Verma, M., Sun, Y., Yang, X., Paul-Limoges, E., Gough, C. M., Wohlfahrt, G., Gioli, B., van der Tol, C., Nouvellon, Y., Lund, M., de Grandcourt, A. (2018). On the relationship between sub-daily instantaneous and daily total gross primary production: Implications for interpreting satellite-based SIF retrievals. *Remote Sensing of Environment* 205: 276–289.

**US-Ne sites:**

Verma, S.B., A. Dobermann, K.G. Cassman, D.T. Walters, J.M. Knops, T.J. Arkebauer, A.E. Suyker, G.G. Burba, B. Amos, H. Yang. D. Ginting, K.G. Hubbard, A.A. Gitelson and E.A. Walter-Shea (2005) Annual carbon dioxide exchange in irrigated and rainfed maize-based agroecosystems. *Agricultural and Forest Meteorology* 131: 77-96.

**CA-Oas:**

Krishnan, P., Black, T.A., Grant, N.J., Barr, A.G., Hogg, E.H., Jassal, R.S., Morgenstern, K. (2006). Impact of changing soil moisture distribution on net ecosystem productivity of a boreal aspen forest during and following drought. *Agric. For. Meteorol.* 139: 208-223.

Stephens, J.J., Black, T.A., Jassal, R.S., Nestic, Z., Grant, N.J., Barr, A.G., Helgason, W., Richardson, A.D., Johnson, M.S., Christen, A. (2018). Effects of forest tent caterpillar defoliation on carbon and water fluxes in a boreal aspen stand. *Agricultural and Forest Meteorology* [doi.org/10.1016/j.agrformet.2018.01.035](https://doi.org/10.1016/j.agrformet.2018.01.035).

**US-UMB:**

Gough C.M., Hardiman B.S., Nave L.E., Bohrer G., Maurer K.D., Vogel C.S., Nadelhoffer KJ, Curtis P.S. 2013. Sustained carbon uptake and storage following moderate disturbance in a Great Lakes forest. *Ecological Applications*, 23, 1202-1215.

US-UMB's Ameriflux DOI: <http://ameriflux.lbl.gov/sites/siteinfo/US-UMB#doi>.

**CH-CHA:**

Hörtnagl L, Barthel M, Buchmann N, Eugster W, Butterbach-Bahl K, Díaz-Pinés E, Zeeman M, Klumpp K, Kiese R, Burri S, Bahn M, Hammerle Albin, Ladreiter-Knauss T, Lu H, Merbold L (2018) Greenhouse

gas fluxes over managed grasslands in Central Europe. *Global Change Biology* 24:1843-1872, doi  
10.1111/gch14079
